# Supplementary material for: Urchin-like NiCo2O4 hollow microspheres and FeSe2 micro-snowflakes for flexible solid-state asymmetric supercapacitors
Source: Royal Society of Chemistry journal article supplement (doi:10.1039/c6ta11001k), 2017-01-01
Supplement: c6ta11001k1.pdf [file c6ta11001k1.pdf]

## **Urchin-like NiCo<sub>2</sub>O<sub>4</sub> Hollow Microspheres and FeSe<sub>2</sub> Microsnowflake for Flexible Solid-State Asymmetric Supercapacitor**

Chenchen Ji,<sup>1</sup> Fuzhu Liu,<sup>1</sup> Liang Xu,<sup>1</sup> Shengchun Yang,<sup>1,2\*</sup>

1 MOE Key Laboratory for Non-equilibrium Synthesis and Modulation of Condensed Matter, State Key Laboratory for Mechanical Behavior of Materials, Xi'an Jiaotong University, Xi'an, 710049, People's Republic of China.

2 Collaborative Innovation Center of Suzhou Nano Science and Technology, Suzhou Academy of Xi'an jiaotong University, 215000, Suzhou, People's Republic of China.

\*Email: ysch1209@mail.xjtu.edu.cn, +86-29-82663034.

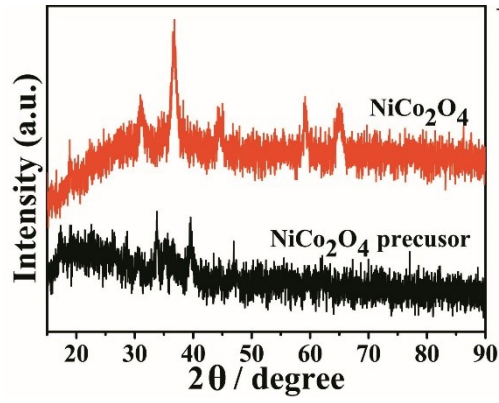

Fig.S1(a) XRD pattern of the NiCo<sub>2</sub>O<sub>4</sub> UHMS precursor.

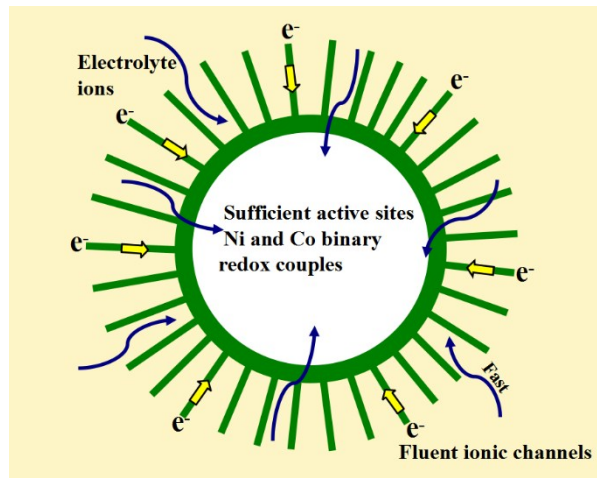

Fig.S2 Scheme for the advantages of this novel NiCo<sub>2</sub>O<sub>4</sub> UHMS structure.

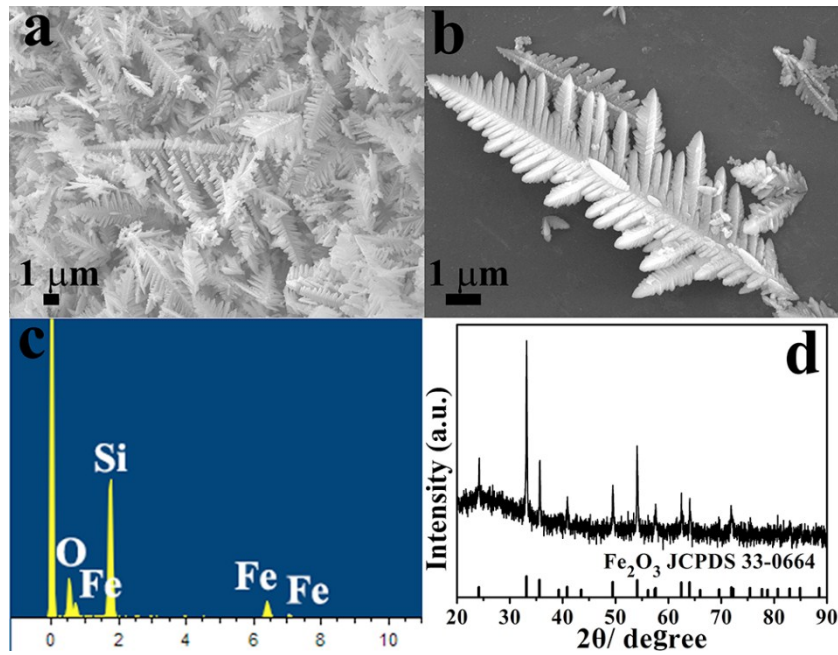

Fig.S3 (a-b) SEM images, (c) EDX spectrum and (d) XRD pattern of the Fe<sub>2</sub>O<sub>3</sub> sample.

SEM images indicate that the element Se would react with Fe<sub>2</sub>O<sub>3</sub> phase through an

ion-exchange process and form a more stable phase of  $\text{FeSe}_2$ . Fig.S4a-b show the morphology of the sample prepared under the same conditions for the  $\text{FeSe}_2$  SF, except that the Se powder was not added. The micron-pine dendrite with some particles after the heating process were observed, and the obtained sample still maintain the orange color of  $\text{Fe}_2\text{O}_3$ . This means that the  $\text{Fe}_2\text{O}_3$  phase was relatively stable in the oleylamine solution at high temperature. In contrast, the addition of Se powder noticeably altered the morphology of the  $\text{Fe}_2\text{O}_3$  (Fig.3a-f). For the sample prepared by only adding the Se powder, fibers with smooth surfaces were observed, with occasional large particles located separately (Fig.S4c-d), which was totally different from the morphology of the original Se powder (Fig.S4d, inset). This results indicated that the element Se would reversibly thermally dissolve and recrystallize from the oleylamine solution, which bring about the formation of the fibers structure. If  $\text{FeCl}_3$  was used as the Fe source, particles assembled by rectangle units without curly structure were obtained, which indicated that only the  $\text{Fe}_2\text{O}_3$  precursor without the Fe-ions can lead the formation of such micron-snowflake and the curly structures. Based on the above results, it indicates that element Se is relative active in the oleylamine during the heating process, which could react with the  $\text{Fe}_2\text{O}_3$  through an anion exchange process to form the more stable phase of  $\text{FeSe}_2$ .

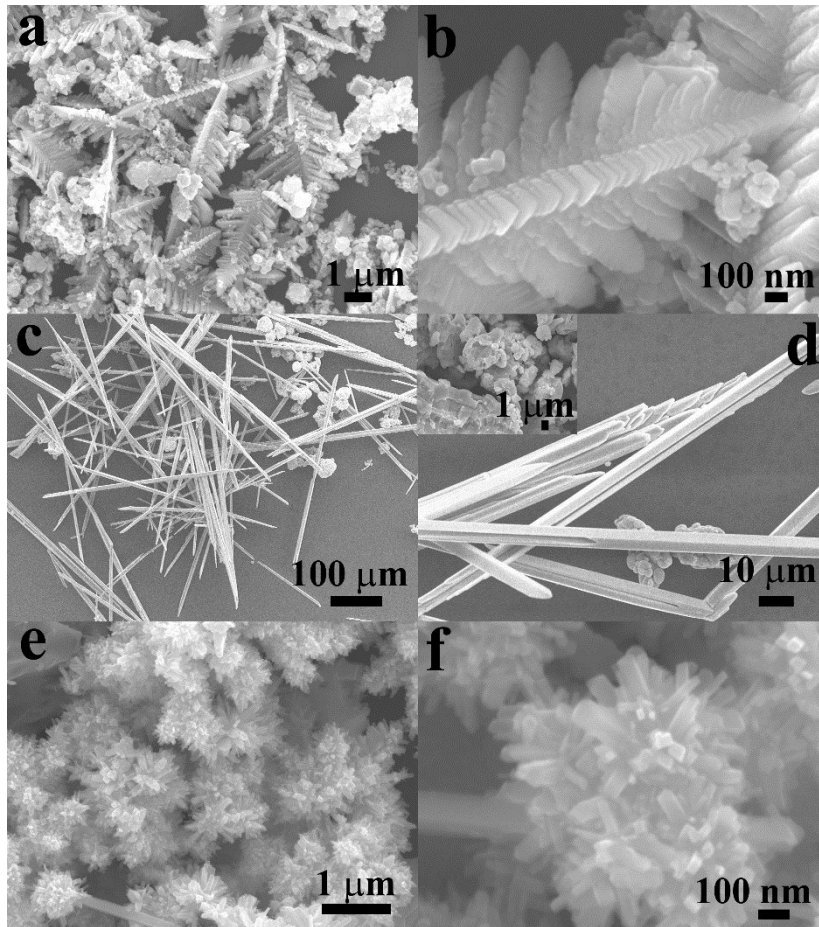

Fig.S4. (a-b) SEM images of the sample prepared under the same conditions for the FeSe<sub>2</sub> SF, except that the element Se was not added. (c-d) SEM images of the sample prepared under the same conditions for the FeSe<sub>2</sub> SF, except that the Fe<sub>2</sub>O<sub>3</sub> was not added. (e-f) SEM images of the sample prepared by using FeCl<sub>3</sub> as the Fe source.

To reveal the evolution process from Fe<sub>2</sub>O<sub>3</sub> micron-pine dendrite to FeSe<sub>2</sub> micron-snowflake architecture, time-dependent experiments were carried out. SEM images for the samples obtained at different reaction time is shown in Fig.S5. During the initial 20 min of accelerating heating from room temperature to 100 °C, the obtained sample still maintains the micron-pine dendrite structure (Fig.S5a and b), which indicated that no exchange-reaction was occurred at this stage. After 30 min of accelerating heating from room temperature to 120 °C (Fig.S5c and d), few snowflakes formed that were grown on the surface of the micron-pine dendrite. When the accelerating heating time was reached to 50 min (Fig.S5c and d), more and more snowflake structures formed with

dissolution of the  $\text{Fe}_2\text{O}_3$  precursor, and the corroded pine dendrite can be clearly seen in the SEM images (Fig.S5e-h). When the reaction temperature reached to 200 °C, well defined snowflake structures were formed until totally dissolution of the pine dendrite precursor (Fig.S5i-t). On the basis of our analyses, it can be inferred that this anion exchange reaction accompanied by a morphology reconstruction process in our reaction system.  $\text{Fe}_2\text{O}_3$  is thermodynamically less stable than that of the  $\text{FeSe}_2$  in the oleylamine solution. The thermally soluble element Se could react with the  $\text{Fe}_2\text{O}_3$  through an anion exchange reaction to form the  $\text{FeSe}_2$  phase by a morphology reconstruction.

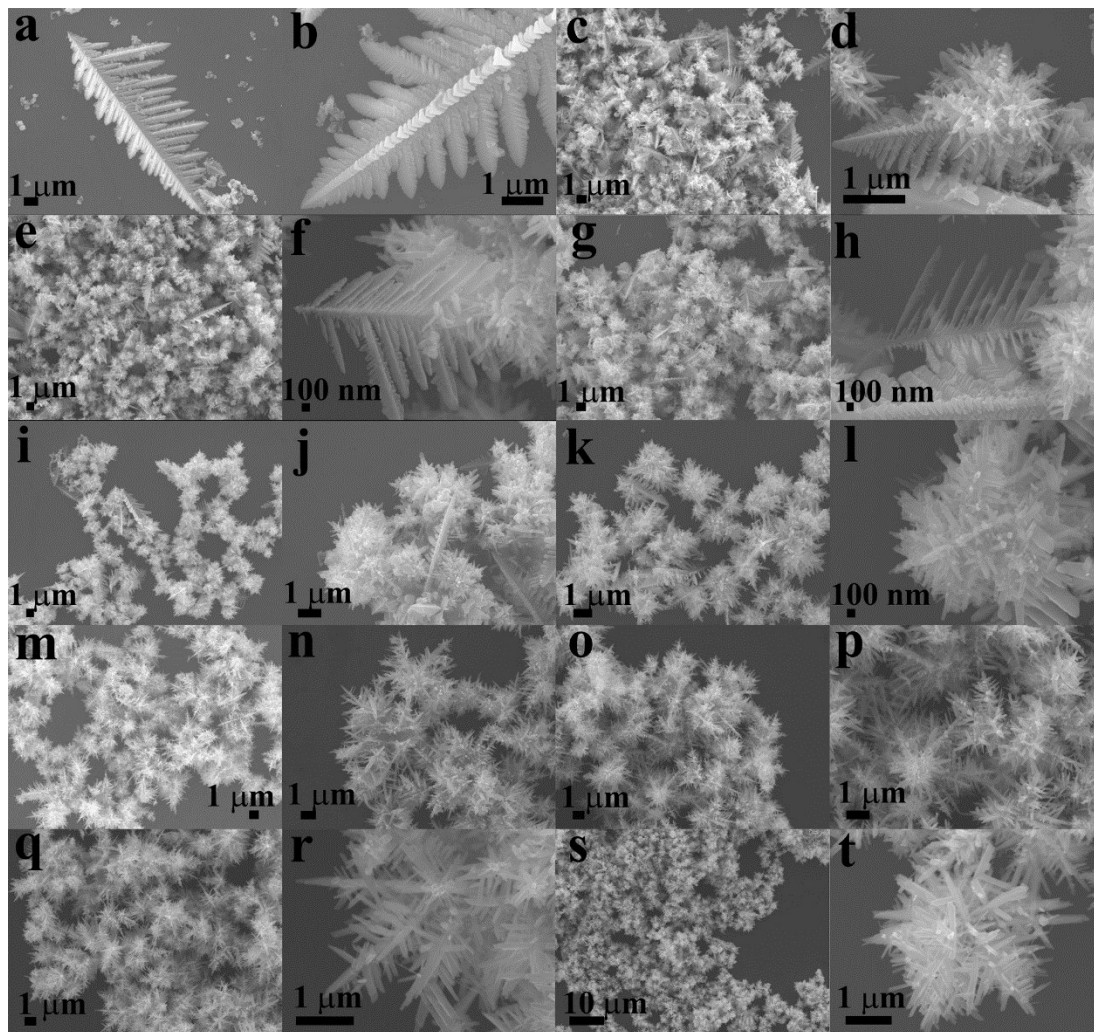

Fig.S5. SEM images of the evolution from  $\text{Fe}_2\text{O}_3$  micron-pine dendrite structure to  $\text{FeSe}_2$  micron-snowflake architecture prepared under different reaction time: after (a-b) 20 min; (c-d) 30 min; (e-f) 50 min; and (g-h) 60 min of accelerating heated from room temperature, and after (i-j) 10 min, (k-l) 20 min, (m-n) 30 min, (o-p) 40 min, (q-r) 50 min, and (s-t) 1 h at 200 °C.

**Table S1. The specific capacitance comparison of other ASC full cells**

| Serial no. | ASC                                                  | Electrolyte                           | Specific capacitance    | Ref      |
|------------|------------------------------------------------------|---------------------------------------|-------------------------|----------|
| 1          | carbon//nickel oxide                                 | 6 M KOH                               | 37 F g <sup>-1</sup>    | 1        |
| 2          | AC//Co <sub>3</sub> O <sub>4</sub> NSs-rGO           | 2 M KOH                               | 46 F g <sup>-1</sup>    | 2        |
| 3          | GHCS//GHCS-MnO <sub>2</sub>                          | 1 M Na <sub>2</sub> SO <sub>4</sub>   | 24.5 F g <sup>-1</sup>  | 3        |
| 4          | GH//MnO <sub>2</sub> -NF                             | 0.5 M Na <sub>2</sub> SO <sub>4</sub> | 41.7 F g <sup>-1</sup>  | 4        |
| 5          | AC//AC-MnO <sub>2</sub>                              | 0.5 M Na <sub>2</sub> SO <sub>4</sub> | 23.1 F g <sup>-1</sup>  | 5        |
| 6          | AC//Ni-Co oxide                                      | 1 M KOH                               | 60 F g <sup>-1</sup>    | 6        |
| 7          | CNFs//Ni <sub>3</sub> S <sub>2</sub> /CNFs           | 2 M KOH                               | 56.6 F g <sup>-1</sup>  | 7        |
| 8          | rGO//NiO                                             | 1 M KOH                               | 50 F g <sup>-1</sup>    | 8        |
| 9          | AC // NiCo <sub>2</sub> O <sub>4</sub> NSs@HMRAAs    | 1 M KOH                               | 70.04 F g <sup>-1</sup> | 9        |
| 10         | FeSe <sub>2</sub> //NiCo <sub>2</sub> O <sub>4</sub> | 2 M KOH                               | 71.7 F g <sup>-1</sup>  | Our work |

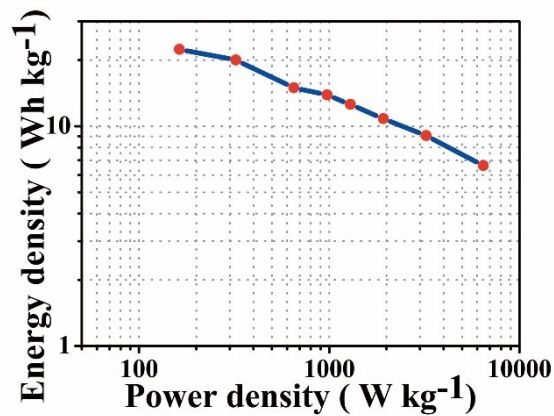

Fig.S6 Ragone plot of the fabricated (-)FeSe<sub>2</sub>/(+)NiCo<sub>2</sub>O<sub>4</sub> ASC device.

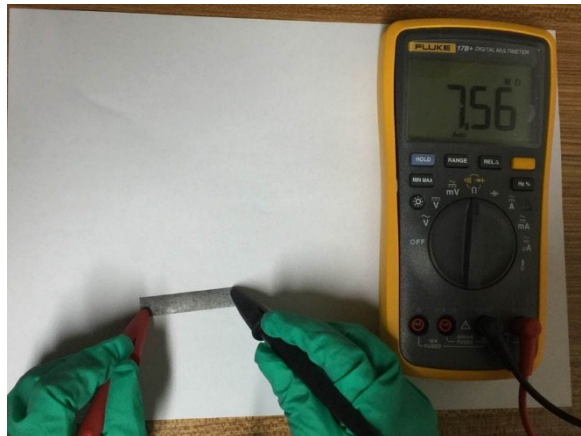

Fig.S7 Optical photographs of the flexible current collector made from Scotch tape with good electrical conductivity.

## Reference:

- [1] Wang, D. W.; Li, F.; Cheng, H. M. Hierarchical Porous Nickel Oxide and Carbon as Electrode Materials for Asymmetric Supercapacitor. *J. Power Sources* **2008**, *185*, 1563-1568.
- [2] Yuan, C.; Zhang, L.; Hou, L.; Pang G.; Oh, W. H. One-Step Hydrothermal Fabrication of Strongly Coupled  $\text{Co}_3\text{O}_4$  Nanosheets-Reduced Graphene Oxide for Electrochemical Capacitors. *RSC Adv.* **2014**, *4*, 14408-14413.
- [3] Lei, Z.; Zhang, J.; Zhao, X. S. Ultrathin  $\text{MnO}_2$  Nanofibers Grown on Graphitic Carbon Spheres as High-Performance Asymmetric Supercapacitor Electrodes. *J. Mater. Chem.* **2012**, *22*, 153-160.
- [4] Gao, H.; Xiao, F.; Ching, C. B.; Duan, H. High-Performance Asymmetric Supercapacitor Based on Graphene Hydrogel and Nanostructured  $\text{MnO}_2$ . *ACS Appl. Mater. Interfaces* **2012**, *4*, 2801-2810.
- [5] Wang, Y. T.; Lu, A. H.; Zhang, H. L.; Li, W. C. Synthesis of Nanostructured Mesoporous Manganese Oxides with Three-Dimensional Frameworks and Their Application in Supercapacitors. *J. Phys. Chem. C* **2011**, *115*, 5413-5421.
- [6] Tang, C.; Tang, Z.; Gong, H. Hierarchically Porous Ni-Co Oxide for High Reversibility Asymmetric Full-Cell Supercapacitors. *J. Electrochem. Soc.* **2012**, *159*, A651-A656.
- [7] Yu, W.; Lin, W.; Shao, X.; Hu, Z.; Li, R.; Yuan, D. High Performance Supercapacitor Based on  $\text{Ni}_3\text{S}_2$ /Carbon Nanofibers and Carbon Nanofibers Electrodes Derived from Bacterial Cellulose. *J. Power Sources* **2014**, *272*, 137-143.
- [8] Luan, F.; Wang, G.; Ling, Y.; Lu, X.; Wang, H.; Tong, Y.; Liu, X. X.; Li, Y. High Energy Density Asymmetric Supercapacitors with a Nickel Oxide Nanoflake Cathode and a 3D Reduced Graphene Oxide Anode. *Nanoscale* **2013**, *5*, 7984-7990.
- [9] Xue-Feng Lu, Dong-Jun Wu, Run-Zhi Li, Qi Li, Sheng-Hua Ye, Ye-Xiang Tong, Gao-Ren Li. Hierarchical  $\text{NiCo}_2\text{O}_4$  nanosheets@hollow microrod arrays for high-performance asymmetric supercapacitors. *J. Mater. Chem. A*, 2014, *2*, 4706-4713.
